# Supplementary material for: Zinc-ion hybrid supercapacitor-batteries with a leaf-like ZIF-L/MgNiO2 micro-sphere composite and a Zn2+/sulfonated poly(ether ether ketone) gel
Source: Royal Society of Chemistry journal article supplement (doi:10.1039/d3se00117b), 2023-01-01
Supplement: d3se00117b1.pdf [file d3se00117b1.pdf]

**Electronic Supplementary Information**

**Zinc-ion Hybrid Supercapacitor-Battery with Leaf-like ZIF-L/MgNiO<sub>2</sub> Micro-spheres  
Composite and a Zn<sup>2+</sup>/Sulfonated Poly(ether ether ketone) Gel**

Ishita Naskar<sup>a</sup>, Partha Ghosal<sup>b</sup> and Melepurath Deepa<sup>a,\*</sup>

*<sup>a</sup>Department of Chemistry, Indian Institute of Technology Hyderabad, Kandi-502284,*

*Sangareddy, Telangana, India*

*<sup>b</sup>Defence Metallurgical Research Laboratory, Defence Research and Development Organization*

*(DRDO), Hyderabad 500058, Telangana, India*

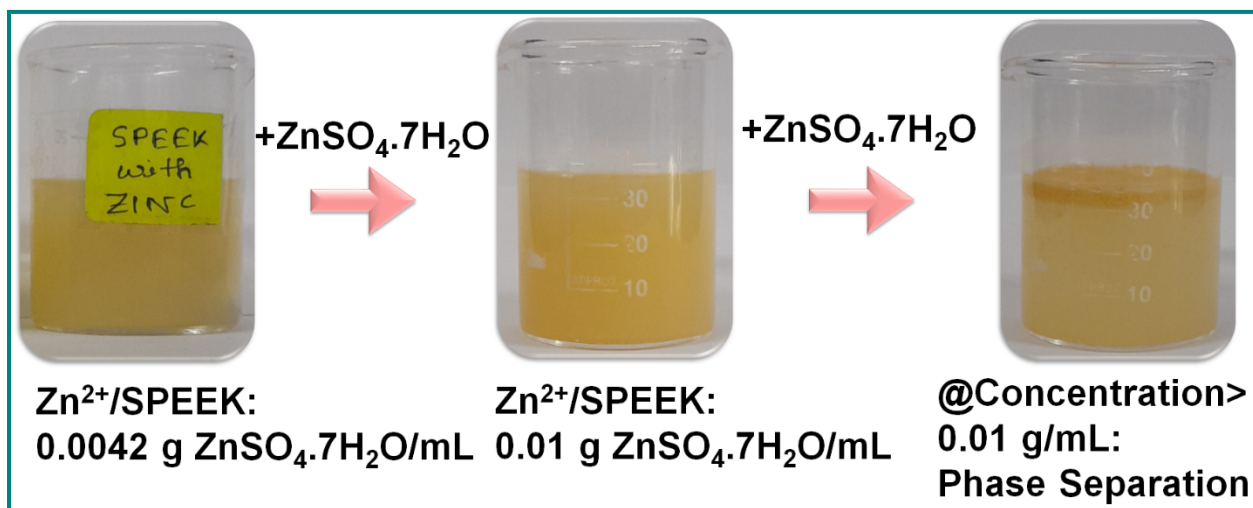

Figure S1 Zn<sup>2+</sup>/SPEEK gel: Solubility test: Effect of increasing concentration of salt ( $\text{ZnSO}_4 \cdot 7\text{H}_2\text{O}$ ) on the nature of the gel.

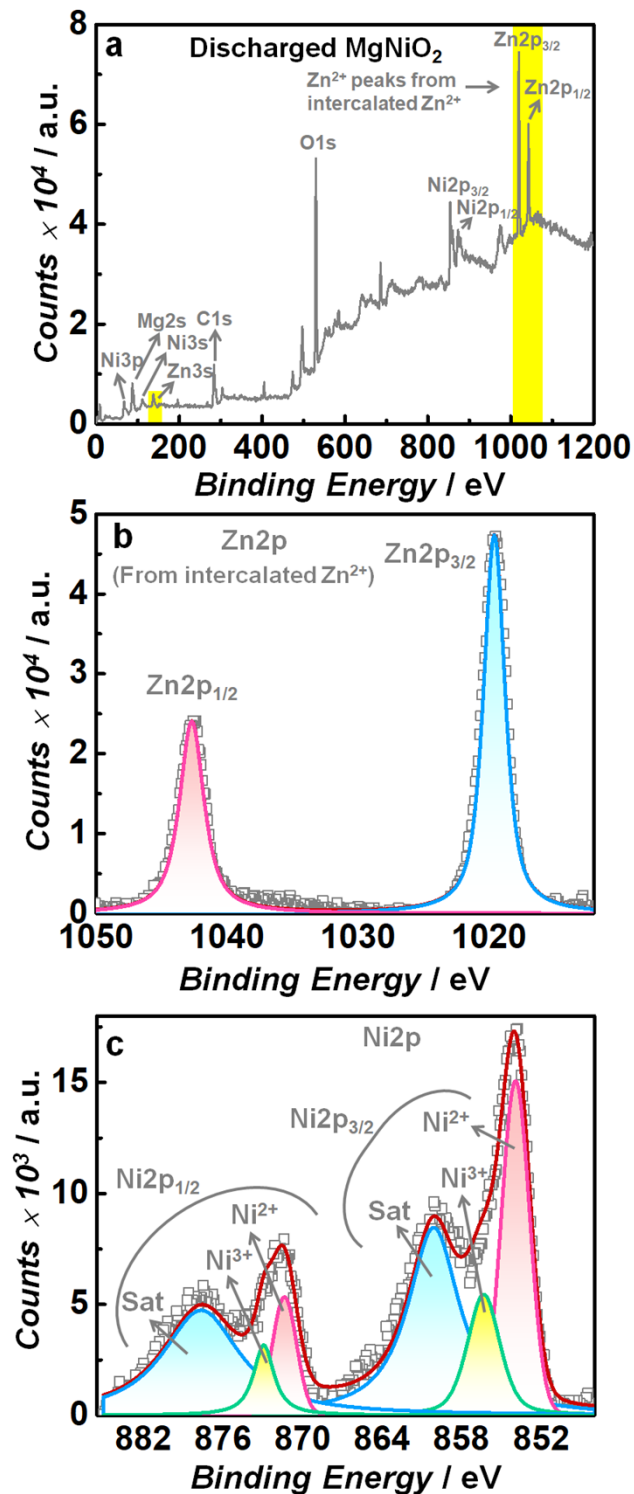

Figure S2 XPS spectra: (a) Survey spectrum and deconvoluted core level spectra of (b) Zn2p and (c) Ni2p of a fully discharged  $\text{MgNiO}_2$  electrode (which was electrochemically cycled and discharged in a  $\text{Zn}^{2+}$ /SPEEK electrolyte).

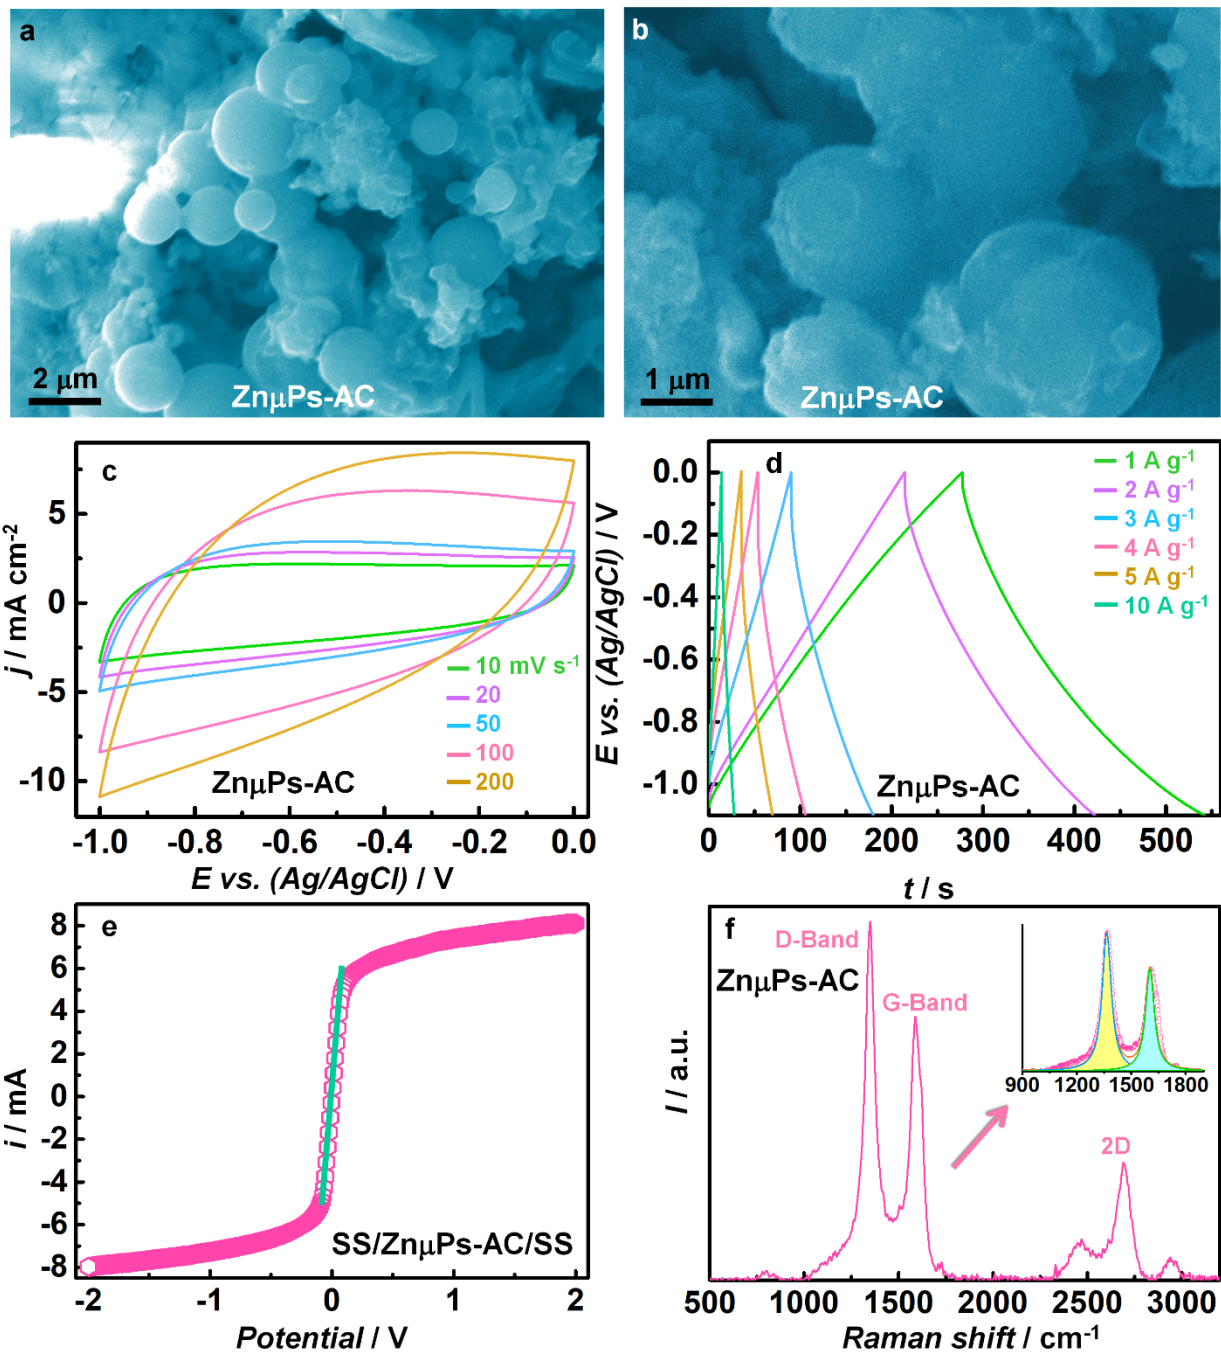

Figure S3 (a,b) FE-SEM images of Zn $\mu$ Ps-AC composite. (c) CV and (d) GCD plots of the Zn $\mu$ Ps-AC composite in a 3-electrode configuration with a Zn<sup>2+</sup>/SPEEK gel electrolyte. (e) I-V characteristics of SS/Zn $\mu$ Ps-AC/SS configuration. (f) Raman spectrum of the Zn $\mu$ Ps-AC composite; inset shows the Gaussian-Lorentzian fits for the D and G bands.
